# Supplementary material for: An Innovative Lipidomic Workflow to Investigate the Lipid Profile in a Cystic Fibrosis Cell Line
Source: PubMed Central journal article supplement (PMC7291020; doi:10.3390/cells9051197), 2020-05-12

## Supplementary materials.

# An innovative lipidomic workflow to investigate the lipid profile in a Cystic Fibrosis cell line

Michele Dei Cas<sup>a,b</sup>, Aida Zulueta<sup>b</sup>, Alessandra Mingione<sup>b,c</sup>, Anna Caretti<sup>b</sup>, Riccardo Ghidoni<sup>b,c</sup>, Paola Signorelli<sup>b</sup>, Rita Paroni<sup>a</sup>

<sup>a</sup>Laboratory of Clinical Biochemistry and Mass Spectrometry, Department of Health Sciences, Università degli Studi di Milano, 20142, Milan, Italy.

<sup>b</sup>Laboratory of Biochemistry and Molecular Biology, Department of Health Sciences, Università degli Studi di Milano, 20142, Milan, Italy.

<sup>c</sup> Aldo Ravelli Center for Neurotechnology and Experimental Brain Therapeutics, Department of Health Sciences, Università degli Studi di Milano, 20142, Milan, Italy.

**Correspondence:** Dr Michele Dei Cas, Laboratory of Clinical Biochemistry and Mass Spectrometry, Department of Health Sciences, Università degli Studi di Milano, via A. di Rudini' 8, 20142, Milan, Italy. tel. +39-0250323272/4, email: michele.deicas@unimi.it

### Index of contents:

**Table S1.** Lipids identification according to MS/MS fragmentation. **Table S2.** Performance comparison between mobile phases buffer. **Table S3.** Performance comparison between analytical columns. **Table S4.** MS-DIAL performances in the lipid identification. **Table S5.** Top-100 lipids selected as potential biomarkers associated with CF phenotype. **Table S6.** Descriptive statistic of the discriminant features divided for lipid classes. **Figure S1.** Sphingolipidomics: comparison between the dedicated extraction of sphingolipid with alkaline methanolysis and total lipid extraction. **Figure S2.** Comparison between the number of lipids evidenced using two different LC analytical columns. **Figure S3.** Total number of MS/MS spectra acquired using different data-dependent settings. **Figure S4.** Distribution of the lipids recognized by lipidomics analysis on the whole set of samples divided by sub-class.

**Table S1.** MS-DIAL achieved lipids identification according to well recognized MS/MS fragmentation pattern as principal adducts found in our experimental conditions.

| Lipid subclasses                                 | Adducts                        | MS/MS fragments (Da)                    | Identification                                        |
|--------------------------------------------------|--------------------------------|-----------------------------------------|-------------------------------------------------------|
| Ceramides                                        | M+H+                           | PI 264.26 or 282.27                     | sphingosine d18:1                                     |
| Dihydroceramides                                 | M+H+                           | PI 266.26 or 284.28                     | dihydrosphingosine d18:0                              |
| Sphingomyelins                                   | M+H+                           | PI 184.07                               | phosphocholine head group                             |
| Neutral glycosphingolipids (HexCer, LacCer, Gb3) | M+H+                           | PI 264.26 or 282.27                     | sphingosine d18:1                                     |
| Acidic glycosphingolipids (GM3, aGM1..)          | M+H+                           | PI 520.5 or 548.5 or 605.5 or 632.5 ... | Loss of water by ceramide residues                    |
| Phosphatidylcholines                             | M+H+                           | PI 184.07                               | phosphocholine head group                             |
| Phosphatidyletanolamines                         | M+H+                           | NL 141.01                               | phosphoethanolamine head group                        |
| Cholesterol esters                               | M+NH <sub>4</sub> <sup>+</sup> | PI 369.35                               | free cholesterol [M-H <sub>2</sub> O+H <sup>+</sup> ] |
| Free cholesterol                                 | M-H <sub>2</sub> O+H+          | PI 147.1 or 161.1                       |                                                       |
| Acylcarnitines                                   | M+                             | PI 85.0                                 | CH <sub>2</sub> CH=CHCOOH cation                      |
| Cardiolipins                                     | M+NH <sub>4</sub> <sup>+</sup> | PI DAG moieties                         |                                                       |
| Triacylglycerols                                 | M+NH <sub>4</sub> <sup>+</sup> |                                         |                                                       |
| with FA 16:0                                     |                                | NL 273.2                                | FA 16:0 + NH <sub>3</sub>                             |
| with FA 18:0                                     |                                | NL 301.2                                | FA 18:0 + NH <sub>3</sub>                             |
| with FA 18:1                                     |                                | NL 299.2                                | FA 18:1 + NH <sub>3</sub>                             |
| with FA 18:2                                     |                                | NL 297.2                                | FA 18:2 + NH <sub>3</sub>                             |
| with FA 18:3                                     |                                | NL 295.2                                | FA 18:3 + NH <sub>3</sub>                             |
| with FA 20:0                                     |                                | NL 329.2                                | FA 20:0 + NH <sub>3</sub>                             |
| with FA 22:0                                     |                                | NL 357.2                                | FA 22:0 + NH <sub>3</sub>                             |
| with FA 22:1                                     |                                | NL 355.2                                | FA 22:1 + NH <sub>3</sub>                             |
| with FA 24:0                                     |                                | NL 385.2                                | FA 24:0 + NH <sub>3</sub>                             |
| with FA 24:1                                     |                                | NL 383.2                                | FA 24:1 + NH <sub>3</sub>                             |
| Phosphatidylinositoles                           | M-H-                           | PI 241.0                                | Rearrangement of inositol head group                  |
| Phosphatidylserine                               | M-H-                           | NL 87.0                                 | Serine head group                                     |
| Phosphatidylglycerols                            | M-H-                           | PI 171.0                                | Glycerols head group                                  |
| Phosphatidic acid                                | M-H-                           | PI 152.9                                | Polar head                                            |

NL, neutral loss; PI, product ions

**Table S2.** Performance comparison between buffers selection (10 mM ammonium acetate vs. 10 mM ammonium formate) in HPLC mobile phases.

A mixture of different lipids (10 ng injected for each lipid, except 25 ng injected for PI) was used to monitor shift in retention times and peak intensities. In the runs with the ammonium acetate, as a buffer, it was assessed a fold-change in the measured lipids of 1.5 (mean) in respect to ammonium formate. Phosphatidylinositol was the only one which displayed a higher intensity with the formate buffer.

| <b>Analytes</b> | <b>m/z</b> | <b>R<sub>T</sub> acetate</b> | <b>R<sub>T</sub> formate</b> | <b>Fold Change in peak height acetate vs formate</b> |
|-----------------|------------|------------------------------|------------------------------|------------------------------------------------------|
| Cholesterol     | 369.3515   | 14.06                        | 13.96                        | <b>1.05</b>                                          |
| SM 18:1         | 729.5905   | 14.59                        | 14.55                        | <b>1.32</b>                                          |
| Cer 18:1        | 564.5350   | 15.47                        | 15.48                        | <b>1.34</b>                                          |
| LPC 18:1        | 522.3554   | 3.36                         | 3.19                         | <b>1.52</b>                                          |
| CE 19:0         | 689.6207   | 18.26                        | 18.33                        | <b>3.59</b>                                          |
| DAG 28:2        | 526.4466   | 13.7                         | 13.35                        | <b>2.11</b>                                          |
| CL 56:6         | 1233.7917  | 16.16                        | 16.25                        | <b>1.66</b>                                          |
| PC 28:2         | 674.4755   | 7.66                         | 7.43                         | <b>1.27</b>                                          |
| TAG 54:3        | 902.8171   | 18.9                         | 18.98                        | <b>1.15</b>                                          |
| PS 28:2         | 676.41841  | 6.11                         | 6.00                         | <b>1.37</b>                                          |
| PE 28:2         | 632.4285   | 8.25                         | 7.99                         | <b>1.21</b>                                          |
| PI 28:2         | 768.4657   | 6.32                         | 6.21                         | <b>0.74</b>                                          |
| PG 28:2         | 680.4497   | 6.51                         | 6.36                         | <b>1.34</b>                                          |
| PA 28:2         | 606.4129   | 7.43                         | 7.25                         | <b>1.21</b>                                          |

**Table S3.** Performance comparison between analytical columns (Acquity CSH 1.7  $\mu\text{m}$  2.1x100 mm *vs* Acquity BEH 1.7  $\mu\text{m}$  2.1x50 mm) using appropriate LC conditions<sup>1</sup> and the same MS methods. A mixture of different lipids (10 ng injected for each lipid, except 25 ng injected for PI) was used to monitor shift in retention times and peak intensities in ESI+. Phosphatidylinositol and phosphatidic acid were the only which displayed a higher intensity using the BEH.

| <b>Analytes</b> | <b>m/z</b> | <b>RT CSH</b> | <b>RT BEH</b> | <b>Fold Change in peak height<sup>CSH vs BEH</sup></b> |
|-----------------|------------|---------------|---------------|--------------------------------------------------------|
| Cholesterol     | 369.3515   | 14.14         | 6.73          | <b>1.03</b>                                            |
| SM 18:1         | 729.5905   | 14.63         | 7.38          | <b>2.28</b>                                            |
| Cer 18:1        | 564.5350   | 15.50         | 8.08          | <b>3.01</b>                                            |
| LPC 18:1        | 522.3554   | 3.47          | 1.52          | <b>1.83</b>                                            |
| CE 19:0         | 689.6207   | 15.90         | 8.24          | <b>1.57</b>                                            |
| DAG 28:2        | 526.4466   | 13.85         | 6.41          | <b>1.34</b>                                            |
| CL 56:6         | 1233.7917  | 16.16         | 9.13          | <b>3.91</b>                                            |
| PC 28:2         | 674.4755   | 7.83          | 4.82          | <b>1.27</b>                                            |
| TAG 54:3        | 902.8171   | 18.90         | 11.52         | <b>7.76</b>                                            |
| PS 28:2         | 676.41841  | 6.18          | 4.15          | <b>0.90</b>                                            |
| PE 28:2         | 632.4285   | 8.42          | 5.06          | <b>0.92</b>                                            |
| PI 28:2         | 768.4657   | 6.32          | 4.08          | <b>0.10</b>                                            |
| PG 28:2         | 680.4497   | 6.57          | 4.38          | <b>1.00</b>                                            |
| PA 28:2         | 606.4129   | 7.44          | 4.69          | <b>0.26</b>                                            |

<sup>1</sup> BEH and CSH conditions were reported in the main text

**Table S4.** MS-DIAL performances in the lipid identification.

MS1-matched lipids which were recognized only by their accurate mass, MS2-matched taking into consideration their accurate mass and their MS/MS fragmentation.

| <b>Analytes</b> | <b>m/z</b> | <b>MS/MS</b> | <b>RT</b> | <b>Identification</b> |
|-----------------|------------|--------------|-----------|-----------------------|
| Cholesterol     | 369.3515   | -            | 14.06     | <b>MS1</b>            |
| SM 18:1         | 729.5905   | 184.07       | 14.59     | <b>MS2</b>            |
| Cer 18:1        | 564.5350   | 264.27       | 15.47     | <b>MS2</b>            |
| LPC 18:1        | 522.3554   | 184.07       | 3.36      | <b>MS2</b>            |
| CE 19:0         | 689.6207   | -            | 18.26     | <b>nd</b>             |
| DAG 28:2        | 526.4466   | -            | 13.7      | <b>MS1</b>            |
| CL 56:6         | 1233.7917  | -            | 16.16     | <b>nd</b>             |
| PC 28:2         | 674.4755   | 184.07       | 7.66      | <b>MS2</b>            |
| TAG 54:3        | 902.8171   | 603.53       | 18.9      | <b>MS2</b>            |
| PS 28:2         | 676.4184   | 491.40       | 6.11      | <b>MS2</b>            |
| PE 28:2         | 632.4285   | 491.40       | 8.25      | <b>MS2</b>            |
| PI 28:2         | 768.4657   | 491.40       | 6.32      | <b>MS2</b>            |
| PG 28:2         | 680.4497   | 491.40       | 6.51      | <b>MS2</b>            |
| PA 28:2         | 606.4129   | 152.9        | 7.43      | <b>MS2</b>            |

nd, not determined

**Table S5.** Top-100 lipids selected as potential biomarkers associated with CF phenotype, in decrescent order according to impact factor.

| Analytes                   | m/z      | class | VIP  | log <sub>2</sub> FC <sup>1</sup> | log <sub>10</sub> p <sup>2</sup> | IF <sup>3</sup> |
|----------------------------|----------|-------|------|----------------------------------|----------------------------------|-----------------|
| TAG 44:0e <sup>4</sup>     | 754.7312 | TAG   | 1.16 | 6.71                             | 3.55                             | 27.67           |
| TAG 46:1e                  | 780.7445 | TAG   | 1.16 | 6.63                             | 3.49                             | 26.85           |
| PC 40:0e                   | 832.7193 | PC    | 1.16 | 6.25                             | 3.55                             | 25.78           |
| PC 30:2e                   | 688.5293 | PC    | 1.15 | 7.09                             | 3.11                             | 25.46           |
| LPC 12:0e                  | 426.2983 | LPC   | 1.16 | 6.87                             | 3.12                             | 24.76           |
| DAG 28:0e                  | 516.4947 | DAG   | 1.15 | 6.89                             | 3.11                             | 24.71           |
| PC 34:6e                   | 736.5298 | PC    | 1.15 | 6.56                             | 3.11                             | 23.57           |
| PC 30:1e                   | 690.5464 | PC    | 1.15 | 6.47                             | 3.11                             | 23.27           |
| LPE 28:0                   | 622.4823 | LPE   | 1.16 | 6.32                             | 3.11                             | 22.73           |
| PC 42:1e                   | 858.7342 | PC    | 1.16 | 5.60                             | 3.49                             | 22.67           |
| PC 34:5e                   | 738.5464 | PC    | 1.15 | 6.23                             | 3.11                             | 22.33           |
| PC 36:6e                   | 764.5612 | PC    | 1.16 | 6.00                             | 3.12                             | 21.62           |
| TAG 46:0e                  | 782.9629 | TAG   | 1.16 | 5.79                             | 3.21                             | 21.53           |
| PC 42:2e                   | 856.7151 | PC    | 1.16 | 5.75                             | 3.21                             | 21.40           |
| PC 30:3e                   | 686.5139 | PC    | 1.16 | 5.94                             | 3.11                             | 21.35           |
| TAG 44:1e                  | 752.7129 | TAG   | 1.16 | 5.88                             | 3.14                             | 21.34           |
| PC 44:2e                   | 884.7467 | PC    | 1.16 | 5.16                             | 3.55                             | 21.29           |
| PC 36:0e                   | 776.6593 | PC    | 1.16 | 5.83                             | 3.11                             | 20.97           |
| TAG 46:2e                  | 778.7284 | TAG   | 1.15 | 5.92                             | 3.02                             | 20.57           |
| TAG 52:6e                  | 854.7584 | TAG   | 1.15 | 5.89                             | 2.97                             | 20.07           |
| TAG 48:3e                  | 804.7456 | TAG   | 1.15 | 6.02                             | 2.88                             | 19.87           |
| TAG 48:2e                  | 806.7506 | TAG   | 1.15 | 5.56                             | 3.09                             | 19.82           |
| PC 46:7e                   | 902.6991 | PC    | 1.16 | 5.30                             | 3.21                             | 19.72           |
| TAG 40:0e                  | 698.6684 | TAG   | 1.15 | 5.41                             | 3.11                             | 19.44           |
| LPC 12:0                   | 440.2757 | LPC   | 1.16 | 5.30                             | 3.14                             | 19.23           |
| TAG 42:0e                  | 726.6987 | TAG   | 1.16 | 5.32                             | 3.12                             | 19.22           |
| PC 36:1e                   | 774.6405 | PC    | 1.15 | 5.34                             | 3.09                             | 19.05           |
| <u>PG 34:2<sup>5</sup></u> | 747.5203 | PG    | 1.16 | 5.02                             | 3.21                             | 18.69           |
| TAG 48:1e                  | 808.7694 | TAG   | 1.15 | 5.19                             | 3.11                             | 18.67           |
| TAG 50:4e                  | 830.7632 | TAG   | 1.14 | 5.93                             | 2.72                             | 18.36           |
| PC 38:0e                   | 804.6816 | PC    | 1.16 | 5.03                             | 3.14                             | 18.26           |
| LPC 26:1                   | 634.4817 | LPC   | 1.15 | 5.03                             | 3.11                             | 18.07           |
| PC 26:0                    | 650.4757 | PC    | 1.15 | 5.00                             | 3.09                             | 17.82           |
| LPC 28:2                   | 660.4924 | LPC   | 1.16 | 4.70                             | 3.21                             | 17.47           |
| <u>FA 26:2</u>             | 391.3578 | FA    | 1.15 | 4.94                             | 3.06                             | 17.43           |
| PC 44:4e                   | 880.7177 | PC    | 1.15 | 4.85                             | 3.11                             | 17.40           |
| PC 34:0e                   | 748.6222 | PC    | 1.15 | 4.99                             | 3.02                             | 17.35           |
| PC 34:4e                   | 740.5577 | PC    | 1.15 | 5.21                             | 2.88                             | 17.22           |
| TAG 54:0e                  | 894.8869 | TAG   | 1.15 | 4.78                             | 3.11                             | 17.14           |
| PE 34:6e                   | 694.4787 | PC    | 1.15 | 4.75                             | 3.11                             | 17.07           |
| TAG 54:1e                  | 892.8713 | TAG   | 1.15 | 4.75                             | 3.11                             | 17.02           |
| TAG 50:3e                  | 832.7747 | TAG   | 1.15 | 5.10                             | 2.90                             | 16.99           |
| LPE 26:0                   | 594.4512 | LPE   | 1.16 | 4.71                             | 3.12                             | 16.98           |

| Analytes               | m/z       | class | VIP  | log <sub>2</sub> FC <sup>1</sup> | log <sub>10</sub> p <sup>2</sup> | IF <sup>3</sup> |
|------------------------|-----------|-------|------|----------------------------------|----------------------------------|-----------------|
| CE 26:1                | 780.7583  | CE    | 1.16 | 4.55                             | 3.21                             | 16.91           |
| <u>PG 32:1e</u>        | 705.5136  | PG    | 1.16 | 4.55                             | 3.21                             | 16.90           |
| CE 26:2                | 778.7456  | CE    | 1.16 | 4.70                             | 3.11                             | 16.88           |
| LPE 24:0               | 566.4167  | LPE   | 1.15 | 4.93                             | 2.97                             | 16.81           |
| LPE 28:1               | 620.4666  | LPE   | 1.15 | 4.79                             | 3.02                             | 16.63           |
| PE 30:1e               | 648.4949  | PC    | 1.15 | 4.65                             | 3.09                             | 16.57           |
| PC 46:6e               | 904.7168  | PC    | 1.16 | 4.42                             | 3.21                             | 16.45           |
| <u>PG 38:5</u>         | 795.5108  | PG    | 1.16 | 4.32                             | 3.29                             | 16.45           |
| LPC 26:3               | 630.4470  | LPC   | 1.16 | 4.42                             | 3.21                             | 16.44           |
| LPE 22:3               | 532.3414  | LPE   | 1.15 | 4.54                             | 3.11                             | 16.28           |
| TAG 50:6e              | 826.7304  | TAG   | 1.14 | 5.26                             | 2.70                             | 16.21           |
| PC 26:5                | 640.3903  | PC    | 1.15 | 4.93                             | 2.87                             | 16.19           |
| PC 28:1                | 676.4897  | PC    | 1.16 | 4.49                             | 3.11                             | 16.15           |
| TAG 52:5e              | 856.7768  | TAG   | 1.14 | 5.25                             | 2.70                             | 16.13           |
| PE 32:4e               | 670.4830  | PC    | 1.15 | 4.48                             | 3.10                             | 16.03           |
| LPE 12:0               | 398.2313  | LPE   | 1.16 | 4.40                             | 3.12                             | 15.86           |
| <u>PG 32:1</u>         | 719.48608 | PG    | 1.15 | 4.68                             | 2.93                             | 15.77           |
| PE 32:5e               | 668.4664  | PC    | 1.15 | 4.37                             | 3.11                             | 15.68           |
| <u>PG 36:2</u>         | 773.53088 | PG    | 1.16 | 4.20                             | 3.21                             | 15.62           |
| CE 26:6                | 770.6807  | CE    | 1.15 | 4.50                             | 3.00                             | 15.53           |
| <u>PG 32:0</u>         | 721.4992  | PG    | 1.15 | 4.28                             | 3.11                             | 15.36           |
| <u>PG 42:8</u>         | 845.5235  | PG    | 1.15 | 4.26                             | 3.11                             | 15.29           |
| TAG 42:1e              | 624.6833  | TAG   | 1.15 | 4.25                             | 3.10                             | 15.19           |
| PC 46:1                | 928.7697  | PC    | 1.15 | 4.20                             | 3.11                             | 15.10           |
| LPE 22:2               | 534.3531  | LPE   | 1.16 | 4.14                             | 3.14                             | 15.02           |
| CE 24:1                | 752.7251  | CE    | 1.16 | 4.07                             | 3.17                             | 14.92           |
| PE 30:3e               | 644.4586  | PC    | 1.15 | 4.32                             | 3.00                             | 14.91           |
| PE 28:0                | 636.4586  | PC    | 1.15 | 4.42                             | 2.93                             | 14.90           |
| CE 26:0                | 782.7768  | CE    | 1.15 | 4.18                             | 3.09                             | 14.89           |
| PC 36:2e               | 772.6211  | PC    | 1.15 | 4.14                             | 3.11                             | 14.88           |
| DAG 52:5               | 856.7641  | DAG   | 1.14 | 4.69                             | 2.76                             | 14.79           |
| PC 46:2                | 926.7436  | PC    | 1.16 | 4.11                             | 3.11                             | 14.79           |
| LPC 26:1               | 634.4782  | LPC   | 1.15 | 4.30                             | 2.98                             | 14.72           |
| PC 34:1e               | 746.6063  | PC    | 1.15 | 4.12                             | 3.09                             | 14.67           |
| TAG 58:1e              | 948.9314  | TAG   | 1.15 | 4.21                             | 3.02                             | 14.61           |
| LPC 28:0               | 664.5289  | LPC   | 1.14 | 4.61                             | 2.76                             | 14.56           |
| CE 24:2                | 750.7127  | CE    | 1.15 | 4.05                             | 3.11                             | 14.53           |
| PC 48:7e               | 930.7340  | PC    | 1.16 | 3.90                             | 3.21                             | 14.51           |
| ACar 18:0 <sup>6</sup> | 428.3742  | ACar  | 1.16 | -4.00                            | 3.11                             | 14.38           |
| LPE 22:1               | 536.3720  | LPE   | 1.15 | 4.06                             | 3.07                             | 14.38           |
| PC 32:0e               | 720.5927  | PC    | 1.15 | 4.01                             | 3.11                             | 14.37           |
| TAG 52:0e              | 866.8562  | TAG   | 1.15 | 3.99                             | 3.11                             | 14.31           |
| CE 34:6                | 882.8071  | CE    | 1.16 | 3.89                             | 3.14                             | 14.12           |
| LPE 24:6               | 554.3260  | LPE   | 1.15 | 3.92                             | 3.11                             | 14.09           |
| PC 44:5e               | 878.7006  | PC    | 1.15 | 3.93                             | 3.10                             | 14.07           |
| <u>PG 38:7</u>         | 791.4871  | PG    | 1.16 | 3.86                             | 3.14                             | 14.02           |

| Analytes           | m/z      | class  | VIP  | log <sub>2</sub> FC <sup>1</sup> | log <sub>10</sub> p <sup>2</sup> | IF <sup>3</sup> |
|--------------------|----------|--------|------|----------------------------------|----------------------------------|-----------------|
| HexCer d18:1, 24:1 | 810.6830 | HexCer | 1.15 | 4.12                             | 2.96                             | 13.99           |
| PC 34:3e           | 742.5757 | PC     | 1.16 | 3.75                             | 3.21                             | 13.97           |
| LPC 18:0e          | 510.3906 | LPC    | 1.15 | 4.02                             | 3.01                             | 13.93           |
| DAG 30:1e          | 542.5146 | DAGe   | 1.14 | 4.49                             | 2.72                             | 13.91           |
| CE 32:6            | 854.7753 | CE     | 1.15 | 3.88                             | 3.11                             | 13.90           |
| LPE 14:0           | 426.2549 | LPE    | 1.15 | 3.86                             | 3.11                             | 13.88           |
| TAG 52:7e          | 852.7459 | TAG    | 1.13 | 4.76                             | 2.56                             | 13.84           |
| LPC 28:3           | 658.4807 | LPC    | 1.16 | 3.79                             | 3.15                             | 13.84           |
| PC 36:5e           | 766.5722 | PC     | 1.16 | 4.06                             | 2.97                             | 13.83           |
| <u>FA 28:1</u>     | 421.4017 | FA     | 1.15 | 4.34                             | 2.78                             | 13.75           |
| TAG 50:5e          | 828.7439 | TAG    | 1.12 | 5.22                             | 2.35                             | 13.72           |

<sup>1</sup> Fold-change was always referred as CF/H cells (cystic fibrosis /healthy phenotype)

<sup>2</sup> p value was corrected for false discovery rate

<sup>3</sup> see equation 3

<sup>4</sup> e indicates the presence of ether- instead of ester-linkage

<sup>5</sup> underlined numbers indicates lipid revealed under ESI-

<sup>6</sup> ACar 18:0 was the only specie in the top-100 lipids which displayed a decrement in the CF phenotype



**Table S6.** Descriptive statistic of the discriminant features (n=624) divided for lipid classes. Others indicate a miscellanea of various lipids (n.21) in different classes with a neglectable importance.

| class   | n.  | min  | 25th | median | 75th  | max   | Mean  | SD   | SEM  | CV%    |
|---------|-----|------|------|--------|-------|-------|-------|------|------|--------|
| ACar    | 10  | 2.71 | 3.82 | 4.91   | 9.22  | 14.38 | 6.34  | 3.78 | 1.19 | 59.58% |
| CE      | 36  | 3.51 | 9.15 | 11.34  | 13.59 | 16.91 | 10.93 | 3.48 | 0.58 | 31.85% |
| Cer     | 12  | 3.83 | 5.04 | 6.83   | 8.88  | 11.34 | 7.01  | 2.40 | 0.69 | 34.19% |
| CL      | 15  | 1.61 | 1.98 | 2.44   | 2.80  | 4.55  | 2.58  | 0.75 | 0.19 | 29.07% |
| DAG     | 37  | 1.65 | 3.18 | 4.55   | 8.85  | 24.71 | 6.33  | 4.82 | 0.79 | 76.10% |
| FA      | 26  | 2.09 | 3.73 | 6.99   | 10.23 | 17.43 | 7.44  | 3.96 | 0.78 | 53.21% |
| Gb3     | 15  | 1.61 | 3.38 | 5.86   | 6.97  | 11.37 | 5.68  | 3.01 | 0.78 | 52.96% |
| HexCer  | 12  | 3.98 | 6.42 | 8.11   | 10.21 | 13.99 | 8.43  | 2.63 | 0.76 | 31.22% |
| LacCer  | 14  | 2.84 | 4.31 | 6.87   | 7.83  | 9.65  | 6.22  | 2.00 | 0.54 | 32.23% |
| LPC     | 56  | 1.44 | 5.77 | 7.19   | 12.09 | 24.76 | 8.90  | 4.75 | 0.64 | 53.39% |
| LPE     | 28  | 1.94 | 4.80 | 11.99  | 14.86 | 22.73 | 10.57 | 5.66 | 1.07 | 53.51% |
| LPG     | 5   | 3.50 | 4.37 | 8.46   | 10.64 | 10.99 | 7.69  | 3.24 | 1.45 | 42.04% |
| LPS     | 9   | 2.32 | 3.16 | 5.85   | 7.53  | 10.17 | 5.73  | 2.59 | 0.86 | 45.12% |
| PC      | 69  | 1.58 | 3.18 | 5.14   | 9.67  | 17.82 | 6.69  | 4.15 | 0.50 | 61.92% |
| etherPL | 59  | 1.51 | 8.68 | 13.83  | 17.40 | 25.78 | 13.39 | 6.31 | 0.82 | 47.10% |
| PE      | 22  | 2.05 | 3.14 | 3.93   | 6.07  | 14.90 | 5.08  | 3.01 | 0.64 | 59.12% |
| PG      | 26  | 1.86 | 4.27 | 11.17  | 15.31 | 18.69 | 10.36 | 5.23 | 1.03 | 50.41% |
| PI      | 5   | 1.97 | 2.79 | 5.02   | 6.47  | 7.91  | 4.71  | 2.19 | 0.98 | 46.53% |
| PS      | 14  | 3.98 | 5.72 | 7.02   | 11.03 | 12.89 | 7.86  | 2.92 | 0.78 | 37.13% |
| SM      | 10  | 1.53 | 3.08 | 6.55   | 10.14 | 13.08 | 6.71  | 3.84 | 1.22 | 57.29% |
| TAG     | 123 | 1.68 | 3.84 | 6.48   | 11.85 | 27.67 | 8.62  | 5.76 | 0.52 | 66.12% |
| Others  | 21  | -    | -    | -      | -     | -     | -     | -    | -    | -      |

**Figure S1.** Sphingolipidomics: comparison between the dedicated extraction of sphingolipid with alkaline methanolysis (Ext sph) and total lipid extraction (Ext tot).

(A) Fold-change (FC) of the main sub-classes of sphingolipids (ceramides, hexosylceramides and sphingomyelins) within the two extraction protocols: the alkaline methanolysis increase the intensity (about 2-fold) of the species due to the removal of the interferences of phospholipids in the extract. Fold-change of the concentration of (B) ceramides, (C) hexosylceramides and (D) sphingomyelins in cystic fibrosis (CF) and healthy phenotypes (H) as the function of the extraction protocols. Taking into account these results, the extraction methods appear to be comparable.

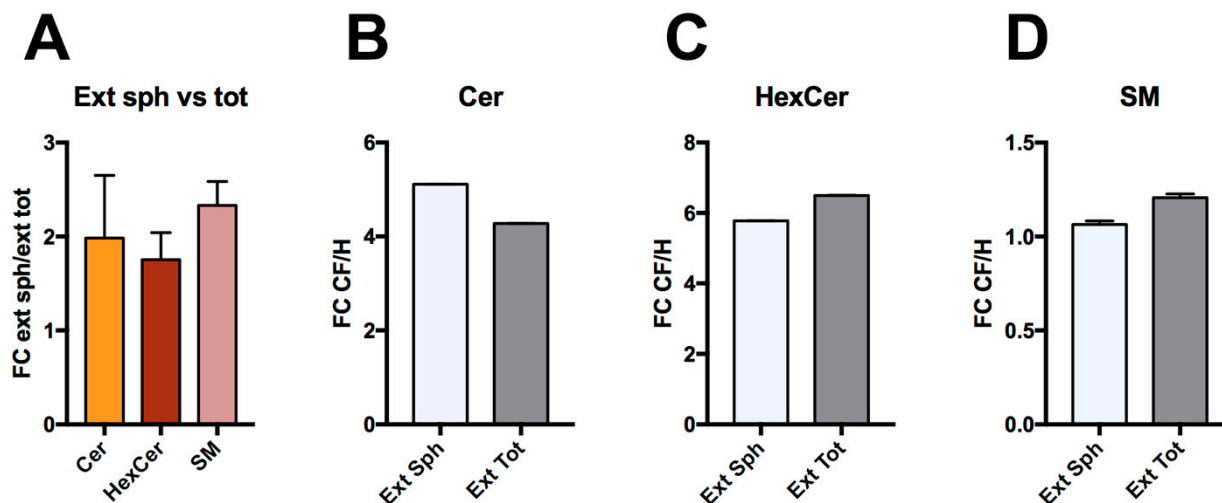

**Figure S2.** Comparison between the number of lipids evidenced using two different LC analytical columns: BEH (50 x 2.1 mm, 1.7  $\mu$ m) vs CSH (100 x 2.1 mm, 1.7  $\mu$ m). CSH showed better performance, with respect to the other configuration, with a +34% in the lipidome coverage.

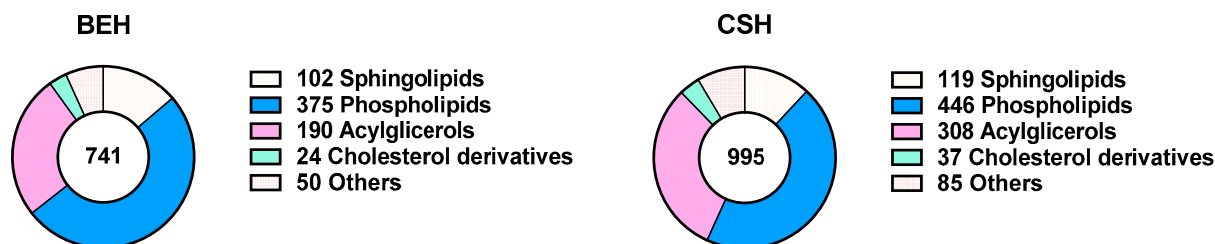

**Figure S3.** Total number of MS/MS spectra acquired using data-dependent top-10, top-18 and top-20 settings.

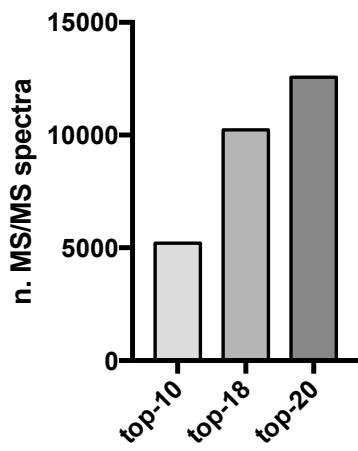

**Figure S4.** Distribution of the lipids recognized by lipidomics analysis on the whole set of samples divided by sub-class.

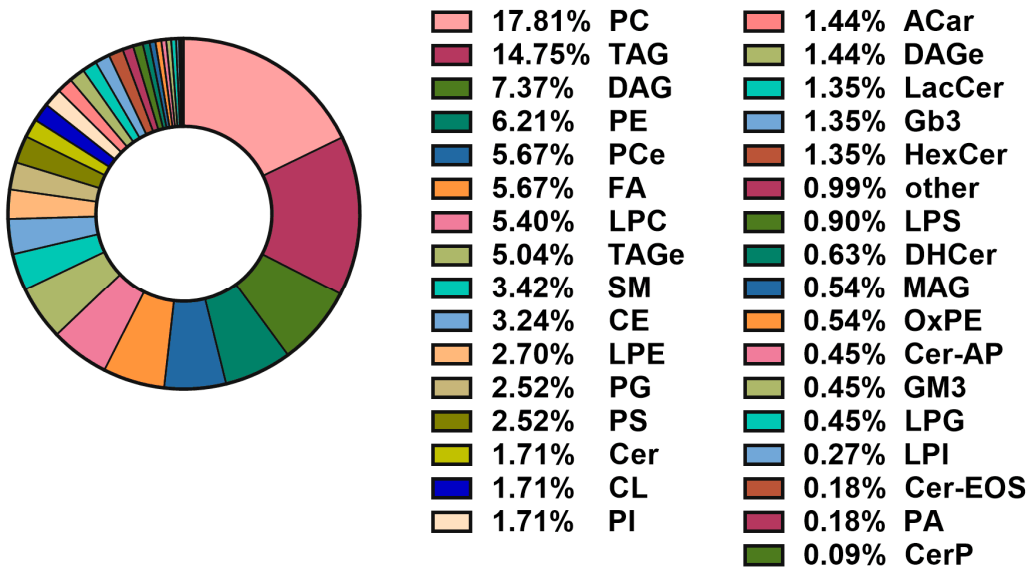

Supplement: cells-09-01197-s001.pdf [file cells-09-01197-s001.pdf]
